# Supplementary material
Source: Springer Nature journal article supplement (https://www.springermedizin.de/resource/supplementary/12891_2012_1561_MOESM1_ESM.pdf/9508116)

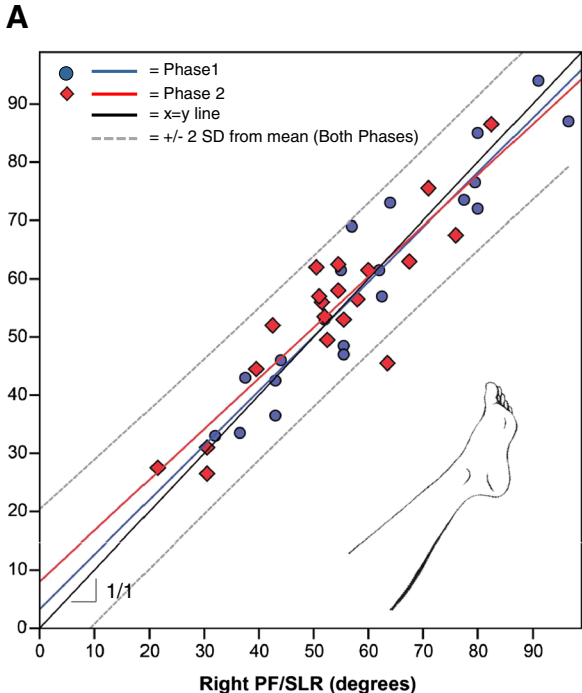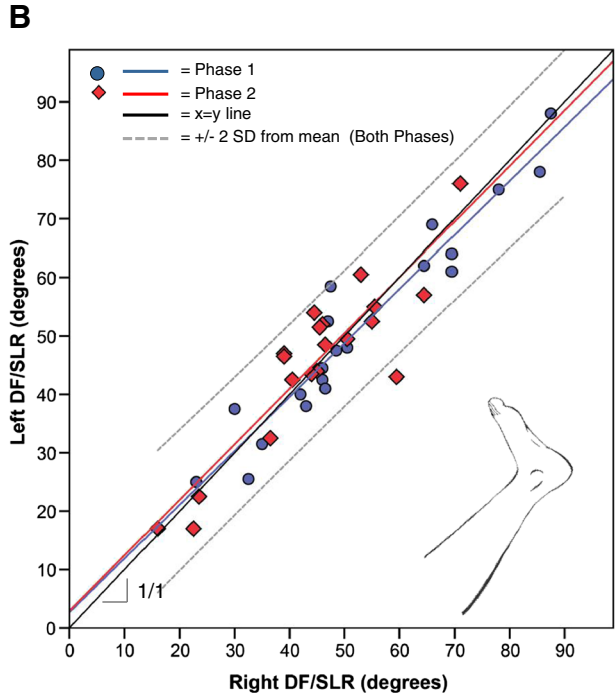

Supplement: MOESM1 [file 9508116]
